# Supplementary material for: Anti-Diabetic Activity and Metabolic Changes Induced by Andrographis paniculata Plant Extract in Obese Diabetic Rats
Source: PubMed Central journal article supplement (PMC6273188; doi:10.3390/molecules21081026), 2016-08-09
Supplement: molecules-21-01026-s001.pdf [file molecules-21-01026-s001.pdf]

# Supplementary Materials: Anti-Diabetic Activity and Metabolic Changes Induced by *Andrographis paniculata* Plant Extract in Obese Diabetic Rats

Muhammad T. Akhtar, Mohamad S. Bin Mohd Sarib, Intan S. Ismail, Faridah Abas, Amin Ismail, Nordin Hj Lajis and Khozirah Shaari

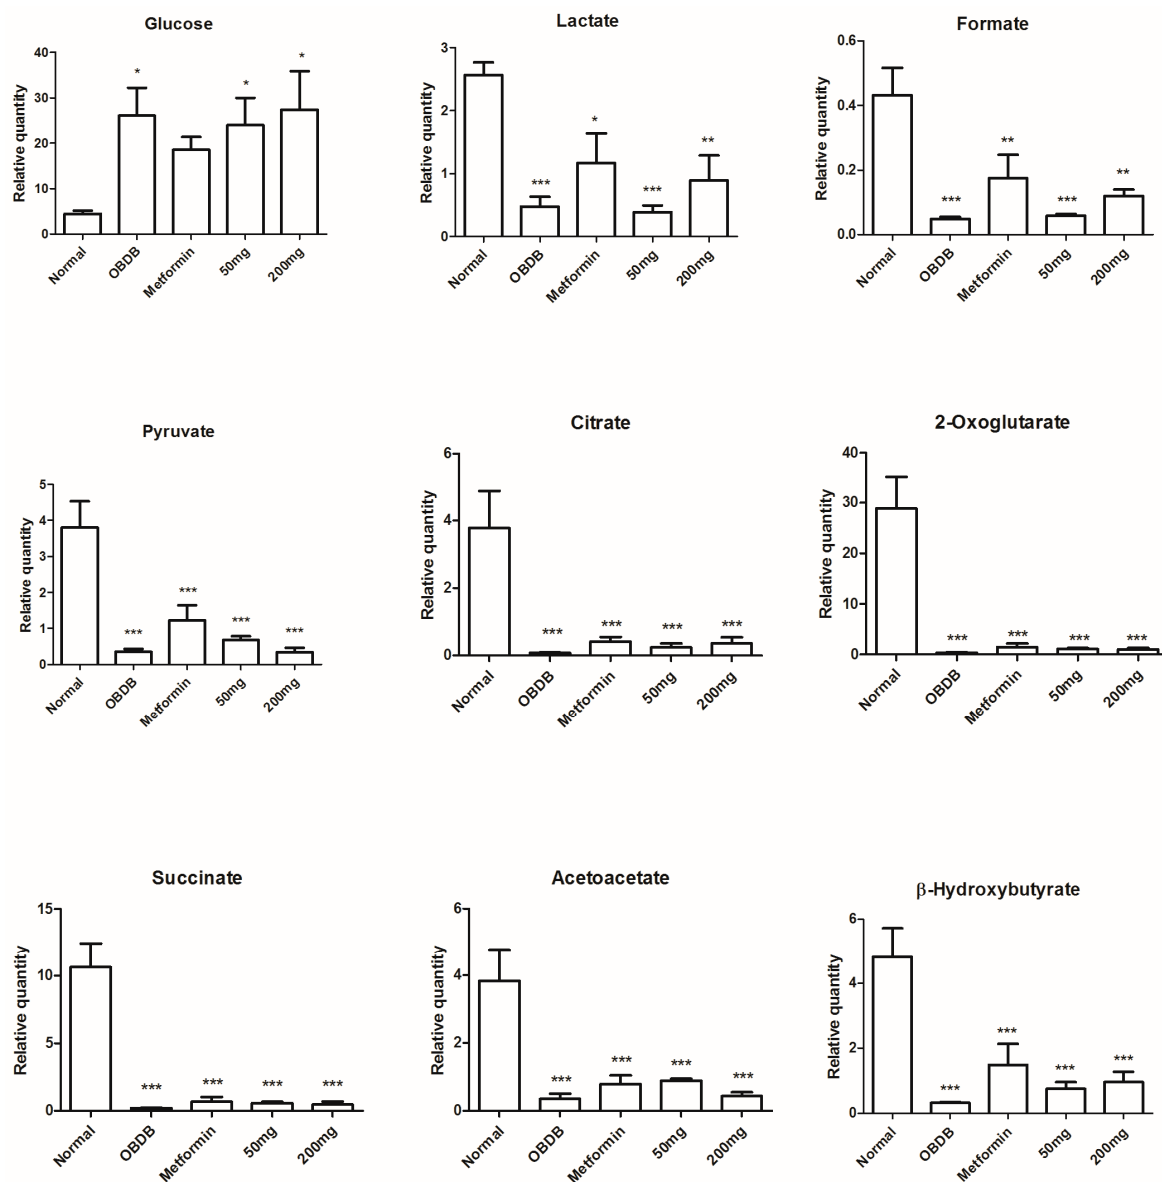

**Figure S1.** Relative quantification of the differentiating metabolites in urine samples (urine samples collected at basal stage) of normal, obese-diabetic (obdb), obese-diabetic rats treated with 50, 200 mg of *A. paniculata* extract and metformin. Relative quantification is based on mean peak area of the related  $^1\text{H}$  NMR signals. \* depict the differences between normal (control) and obese-diabetic (obdb), obese-diabetic rats treated with the different concentrations of *A. paniculata* extract and metformin. Statistical icons: \*  $p < 0.05$ , \*\*  $p < 0.01$  and \*\*\*  $p < 0.001$ .

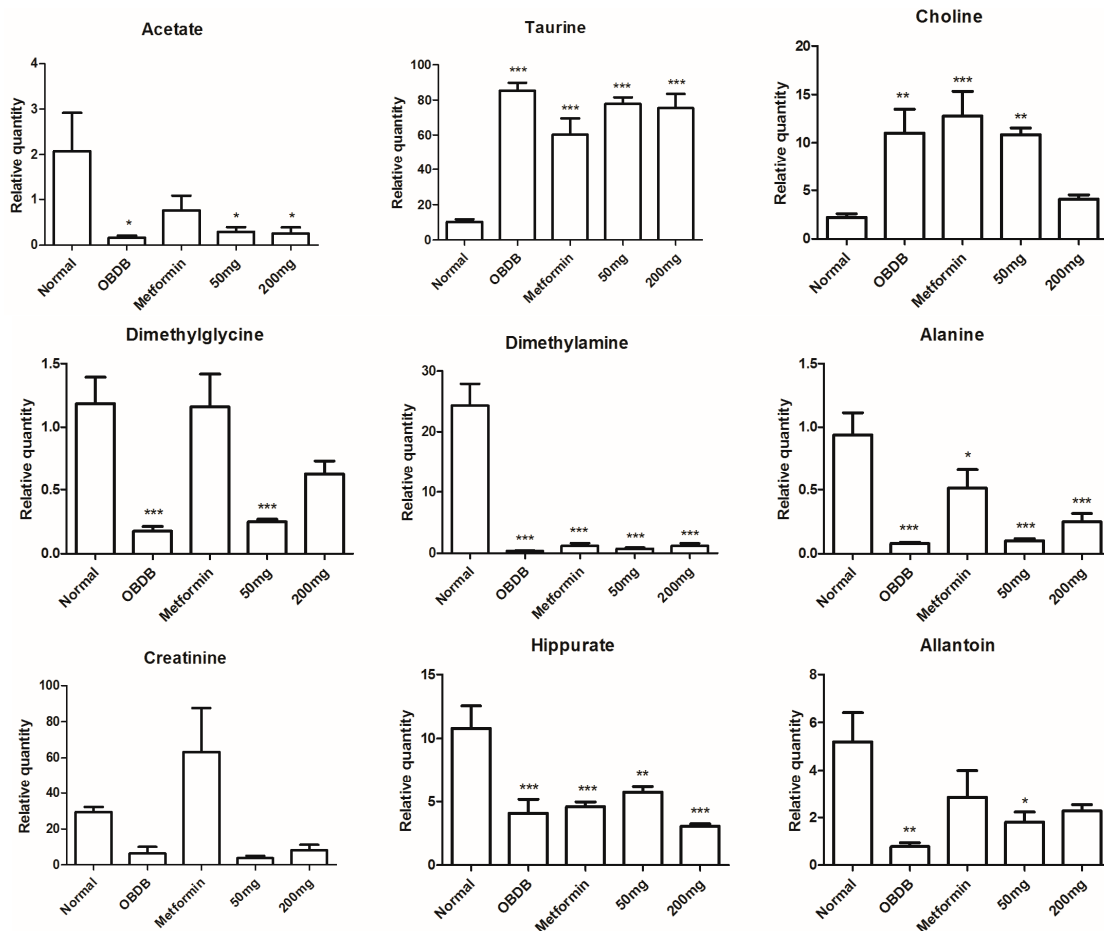

**Figure S2.** Relative quantification of the differentiating metabolites in urine samples (urine samples collected at basal stage) of normal, obese-diabetic (obdb), obese-diabetic rats treated with 50, 200 mg of *A. paniculata* extract and metformin. Relative quantification is based on mean peak area of the related  $^1\text{H}$  NMR signals. \* depict the differences between normal (control) and obese-diabetic (obdb), obese-diabetic rats treated with the different concentrations of *A. paniculata* extract and metformin. Statistical icons: \*  $p < 0.05$ , \*\*  $p < 0.01$  and \*\*\*  $p < 0.001$ .

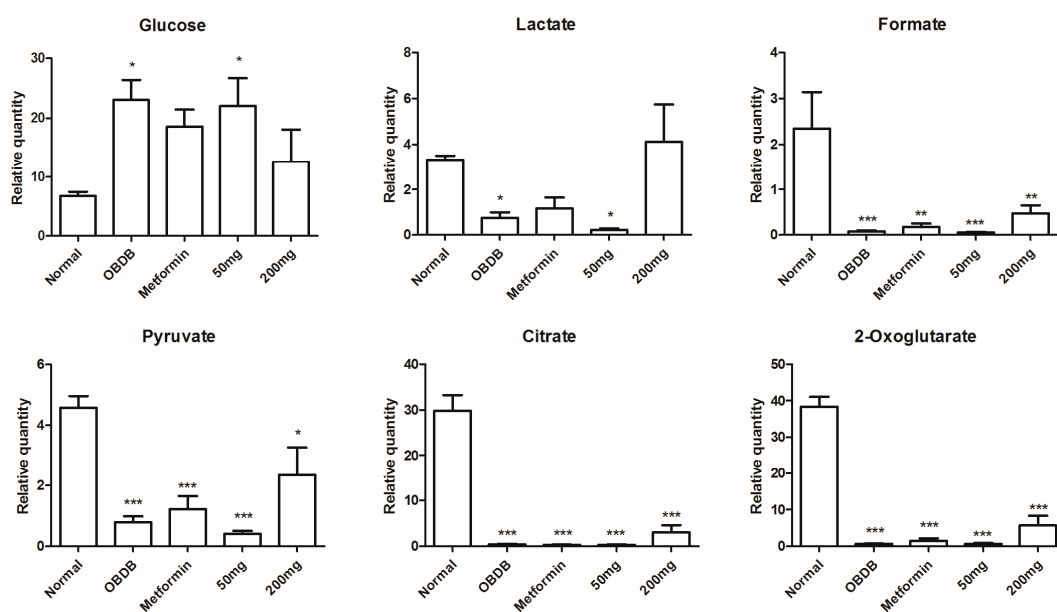

**Figure S3.** Cont.

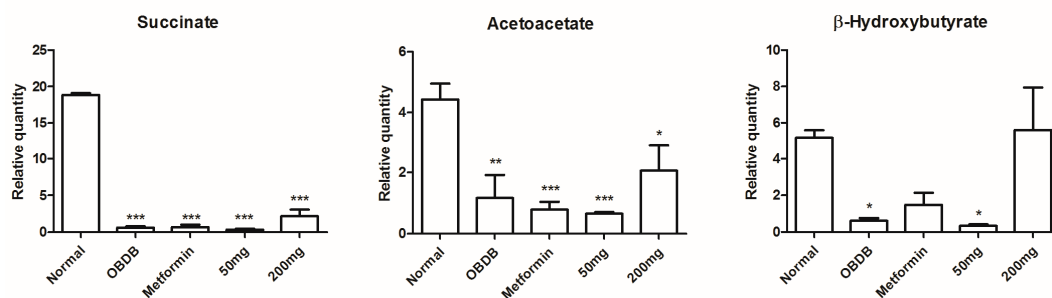

**Figure S3.** Relative quantification of the differentiating metabolites in urine samples (urine samples collected at middle stage) of normal, obese-diabetic (obdb), obese-diabetic rats treated with 50, 200 mg of *A. paniculata* extract and metformin. Relative quantification is based on mean peak area of the related  $^1\text{H}$  NMR signals. \* depict the differences between normal (control) and obese-diabetic (obdb), obese-diabetic rats treated with the different concentrations of *A. paniculata* extract and metformin. Statistical icons: \*  $p < 0.05$ , \*\*  $p < 0.01$  and \*\*\*  $p < 0.001$ .

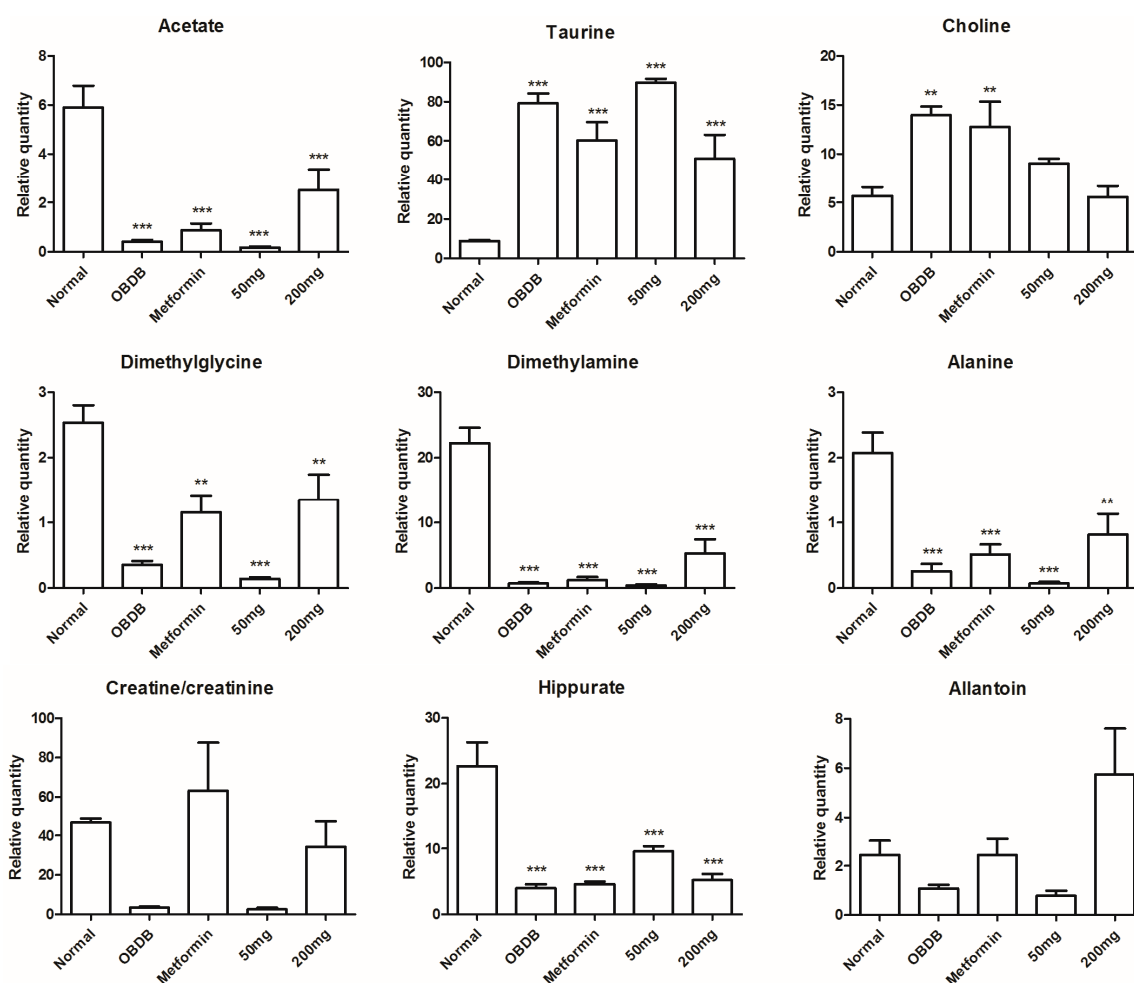

**Figure S4.** Relative quantification of the differentiating metabolites in urine samples (urine samples collected at middle stage) of normal, obese-diabetic (obdb), obese-diabetic rats treated with 50, 200 mg of *A. paniculata* extract and metformin. Relative quantification is based on mean peak area of the related  $^1\text{H}$  NMR signals. \* depict the differences between normal (control) and obese-diabetic (obdb), obese-diabetic rats treated with the different concentrations of *A. paniculata* extract and metformin. Statistical icons: \*  $p < 0.05$ , \*\*  $p < 0.01$  and \*\*\*  $p < 0.001$ .

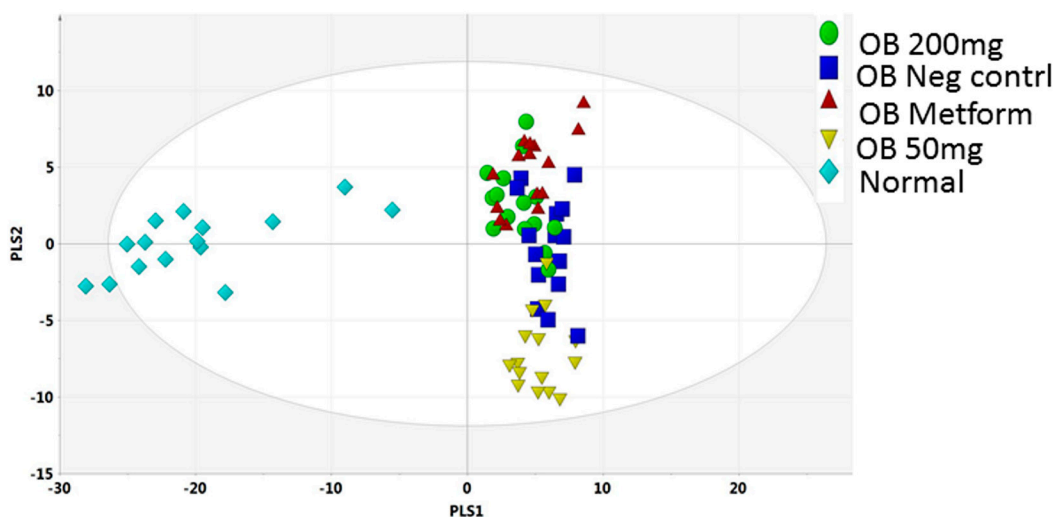

**Figure S5.** PCA score plot of normal, obese and obese treated (50, 200 mg of *A. paniculata* extract and metformin) rats urine samples collected at basal, middle and final stage. Normal (normal), obese (OB Neg contrl), obese rats treated with 50 mg of *A. paniculata* extract (OB 50mg), obese rats treated with 200 mg of *A. paniculata* extract (OB 200mg), obese rats treated with metformin (OB metform).

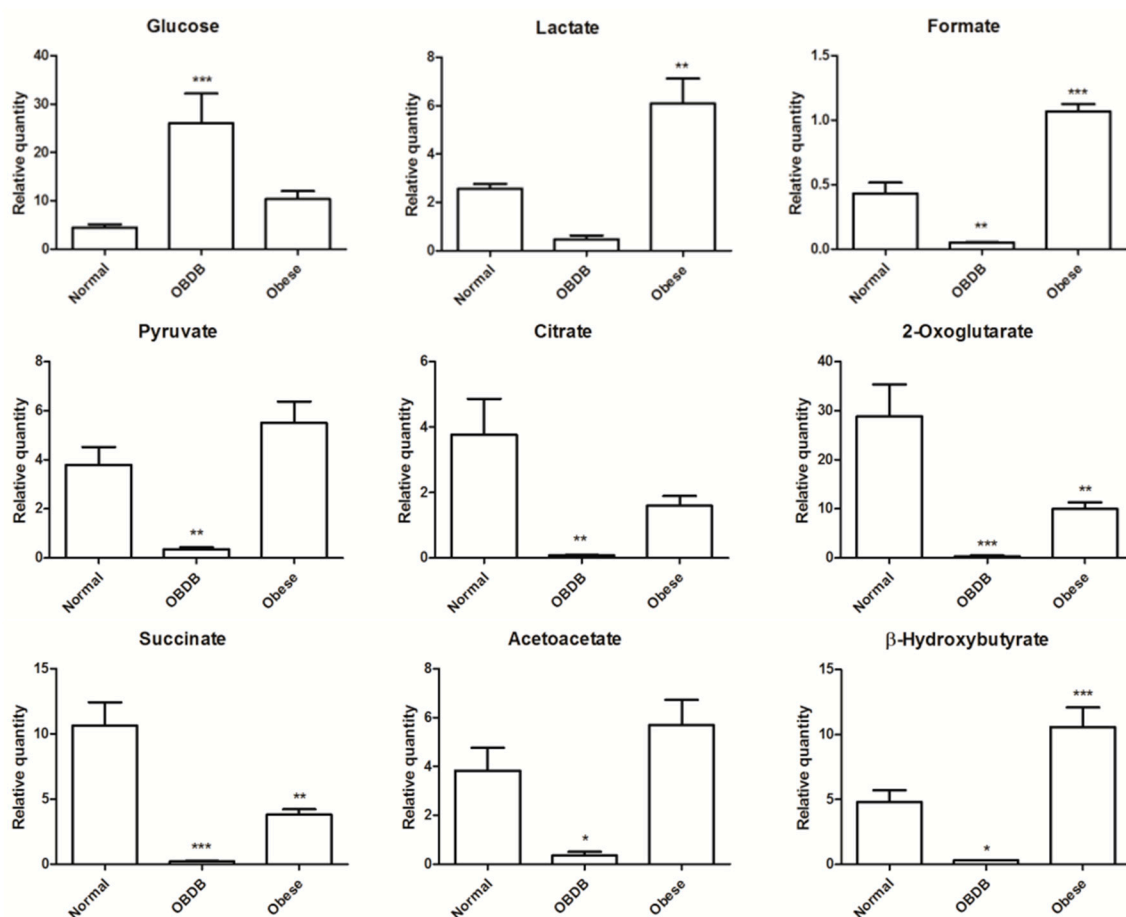

**Figure S6.** Relative quantification of the differentiating metabolites in urine samples (urine samples collected at basal stage) of normal, obese and obese-diabetic (obdb) rats. Relative quantification is based on mean peak area of the related  $^1\text{H}$  NMR signals. \* depict the differences between normal (control) and obese and obese-diabetic (obdb) rats. Statistical icons: \*  $p < 0.05$ , \*\*  $p < 0.01$  and \*\*\*  $p < 0.001$ .

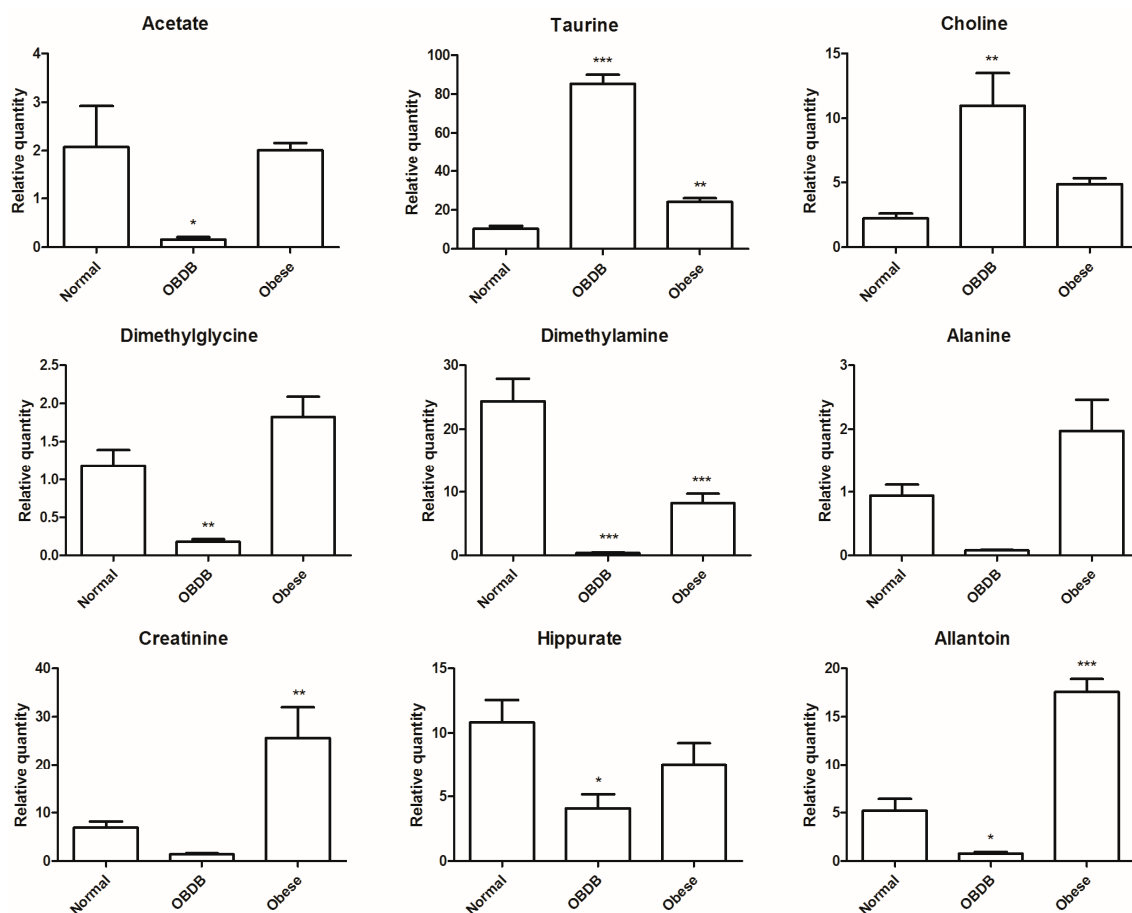

**Figure S7.** Relative quantification of the differentiating metabolites in urine samples (urine samples collected at basal stage) of normal, obese and obese-diabetic (obdb) rats. Relative quantification is based on mean peak area of the related  $^1\text{H}$  NMR signals. \* depict the differences between normal (control) and obese and obese-diabetic (obdb) rats. Statistical icons: \*  $p < 0.05$ , \*\*  $p < 0.01$  and \*\*\*  $p < 0.001$ .

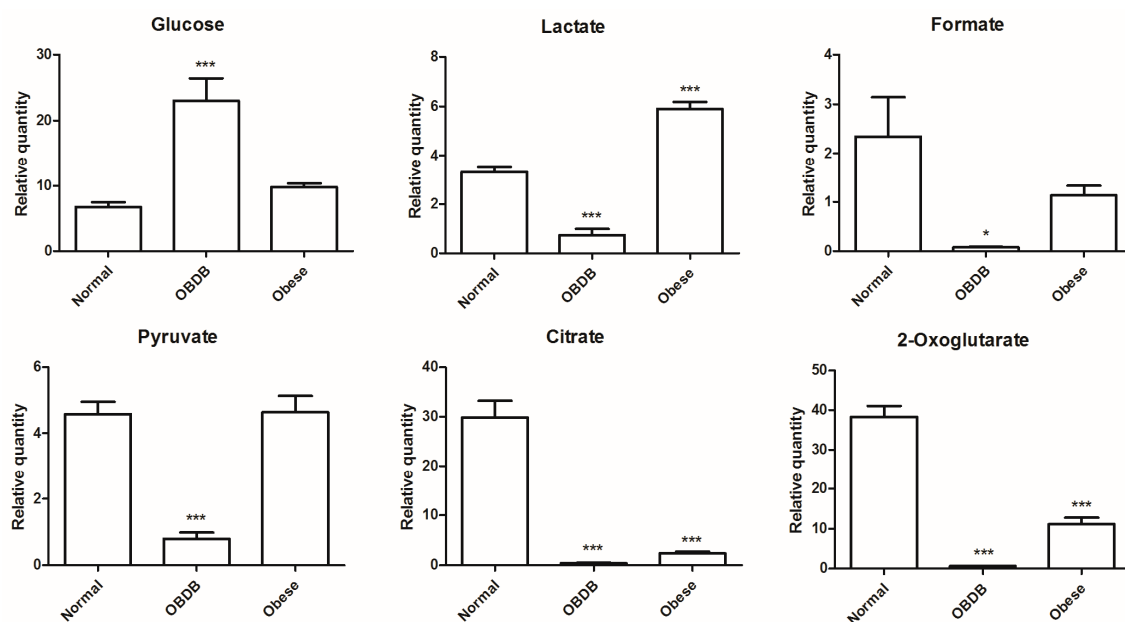

**Figure S8.** Cont.

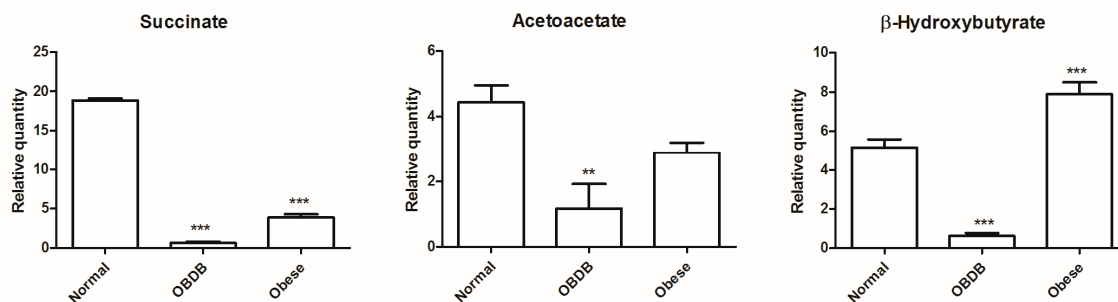

**Figure S8.** Relative quantification of the differentiating metabolites in urine samples (urine samples collected at middle stage) of normal, obese and obese-diabetic (obdb) rats. Relative quantification is based on mean peak area of the related  $^1\text{H}$  NMR signals. \* depict the differences between normal (control) and obese and obese-diabetic (obdb) rats. Statistical icons: \*  $p < 0.05$ , \*\*  $p < 0.01$  and \*\*\*  $p < 0.001$ .

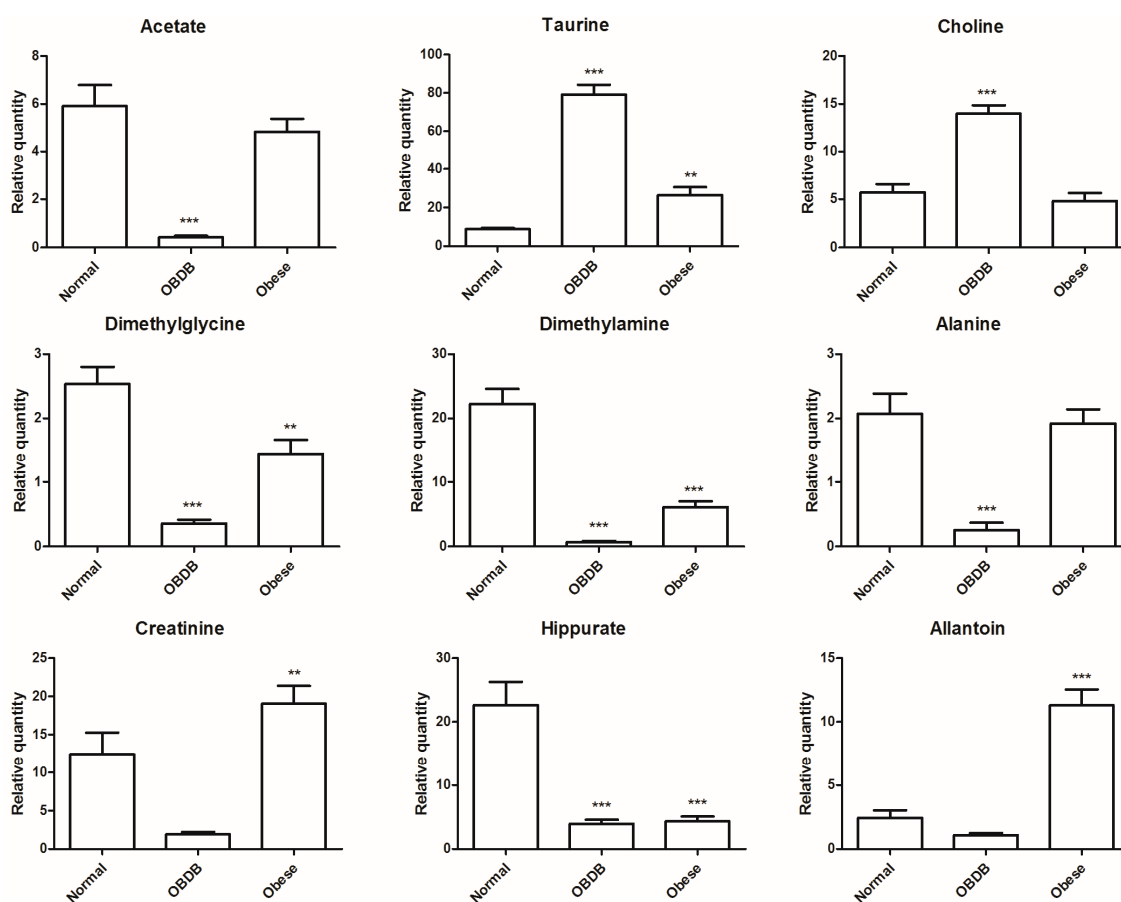

**Figure S9.** Relative quantification of the differentiating metabolites in urine samples (urine samples collected at basal stage) of normal, obese and obese-diabetic (obdb) rats. Relative quantification is based on mean peak area of the related  $^1\text{H}$  NMR signals. \* depict the differences between normal (control) and obese and obese-diabetic (obdb) rats. Statistical icons: \*  $p < 0.05$ , \*\*  $p < 0.01$  and \*\*\*  $p < 0.001$ .

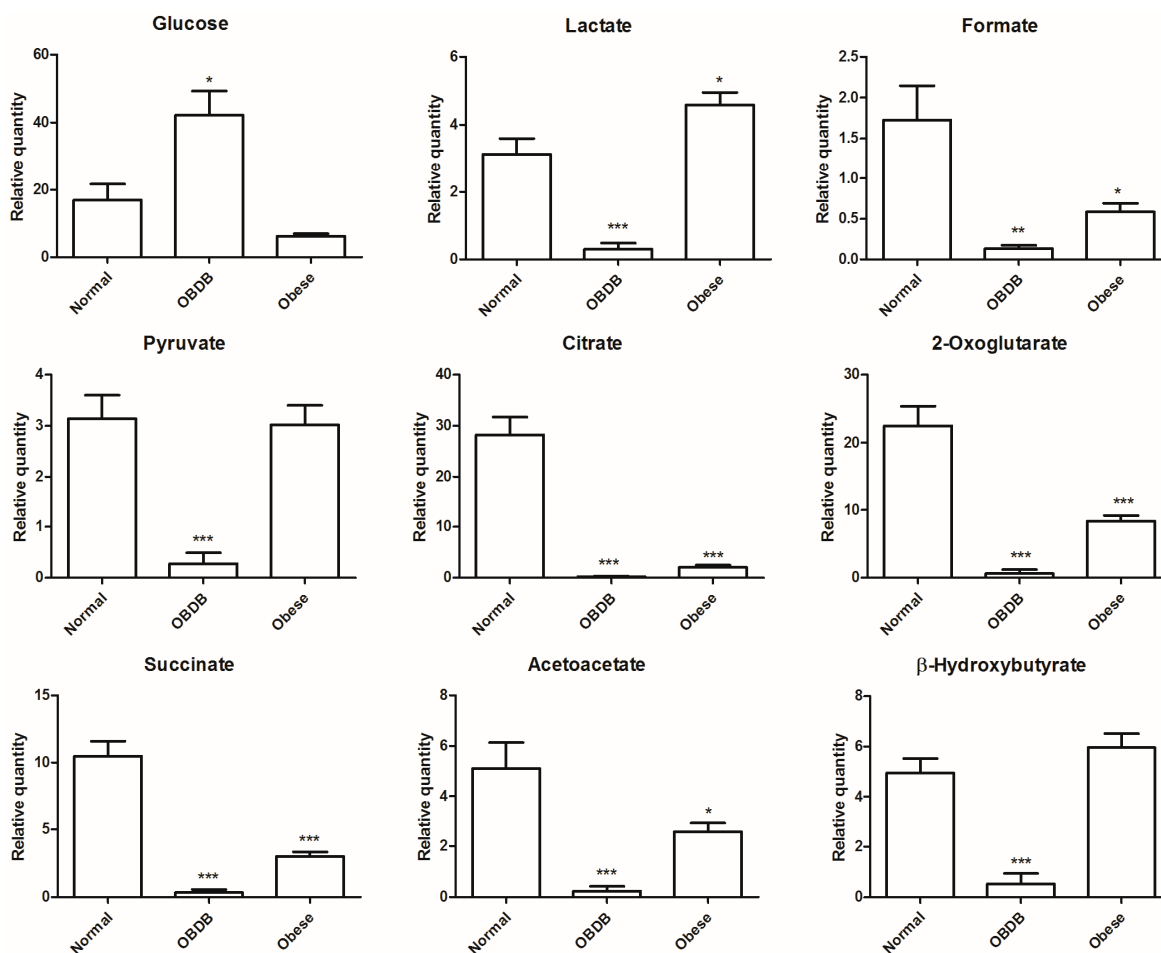

**Figure S10.** Relative quantification of the differentiating metabolites in urine samples (urine samples collected at final stage) of normal, obese and obese-diabetic (obdb) rats. Relative quantification is based on mean peak area of the related  $^1\text{H}$  NMR signals. \* depict the differences between normal (control) and obese and obese-diabetic (obdb) rats. Statistical icons: \*  $p < 0.05$ , \*\*  $p < 0.01$  and \*\*\*  $p < 0.001$ .

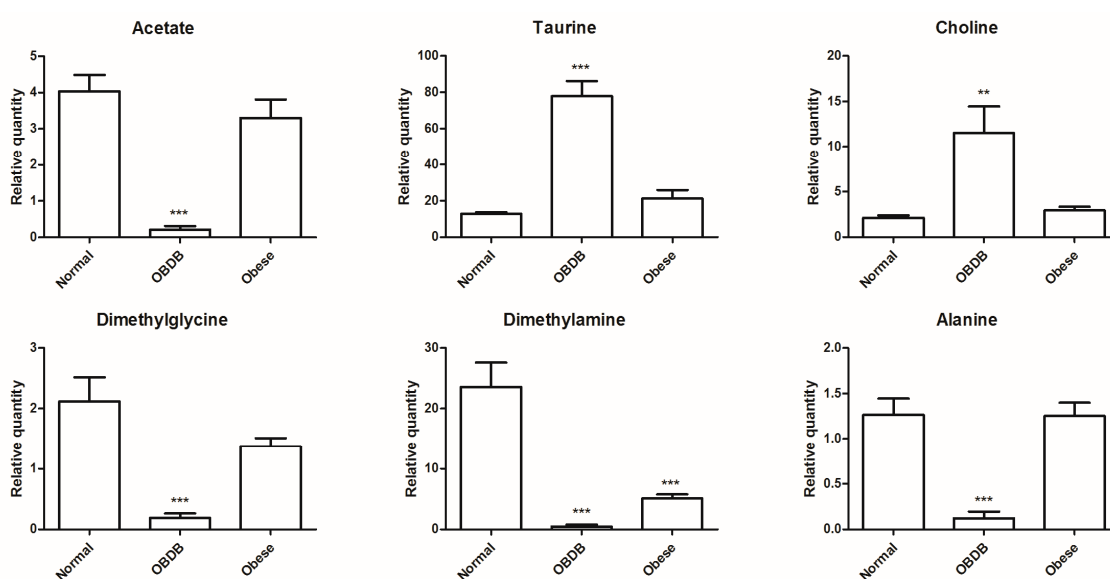

**Figure S11.** Cont.

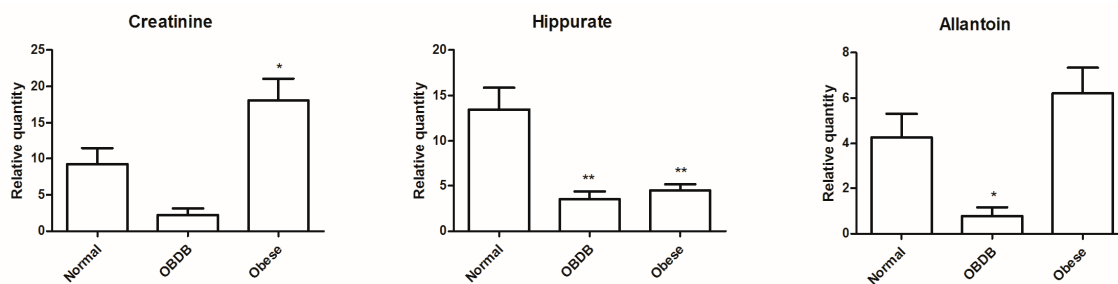

**Figure S11.** Relative quantification of the differentiating metabolites in urine samples (urine samples collected at final stage) of normal, obese and obese-diabetic (obdb) rats. Relative quantification is based on mean peak area of the related  $^1\text{H}$  NMR signals. \* depict the differences between normal (control) and obese and obese-diabetic (obdb) rats. Statistical icons: \*  $p < 0.05$ , \*\*  $p < 0.01$  and \*\*\*  $p < 0.001$ .
